# Supplementary material for: Circulation of pertussis and poor protection against diphtheria among middle-aged adults in 18 European countries
Source: PubMed Central journal article supplement (PMC8128873; doi:10.1038/s41467-021-23114-y), 2021-05-17
Supplement: 41467_2021_23114_MOESM1_ESM.pdf [file 41467_2021_23114_MOESM1_ESM.pdf]

**Supplementary Information to the manuscript**

**Circulation of pertussis and poor protection against diphtheria among middle-aged adults in 18 European countries**

## IgG-PT

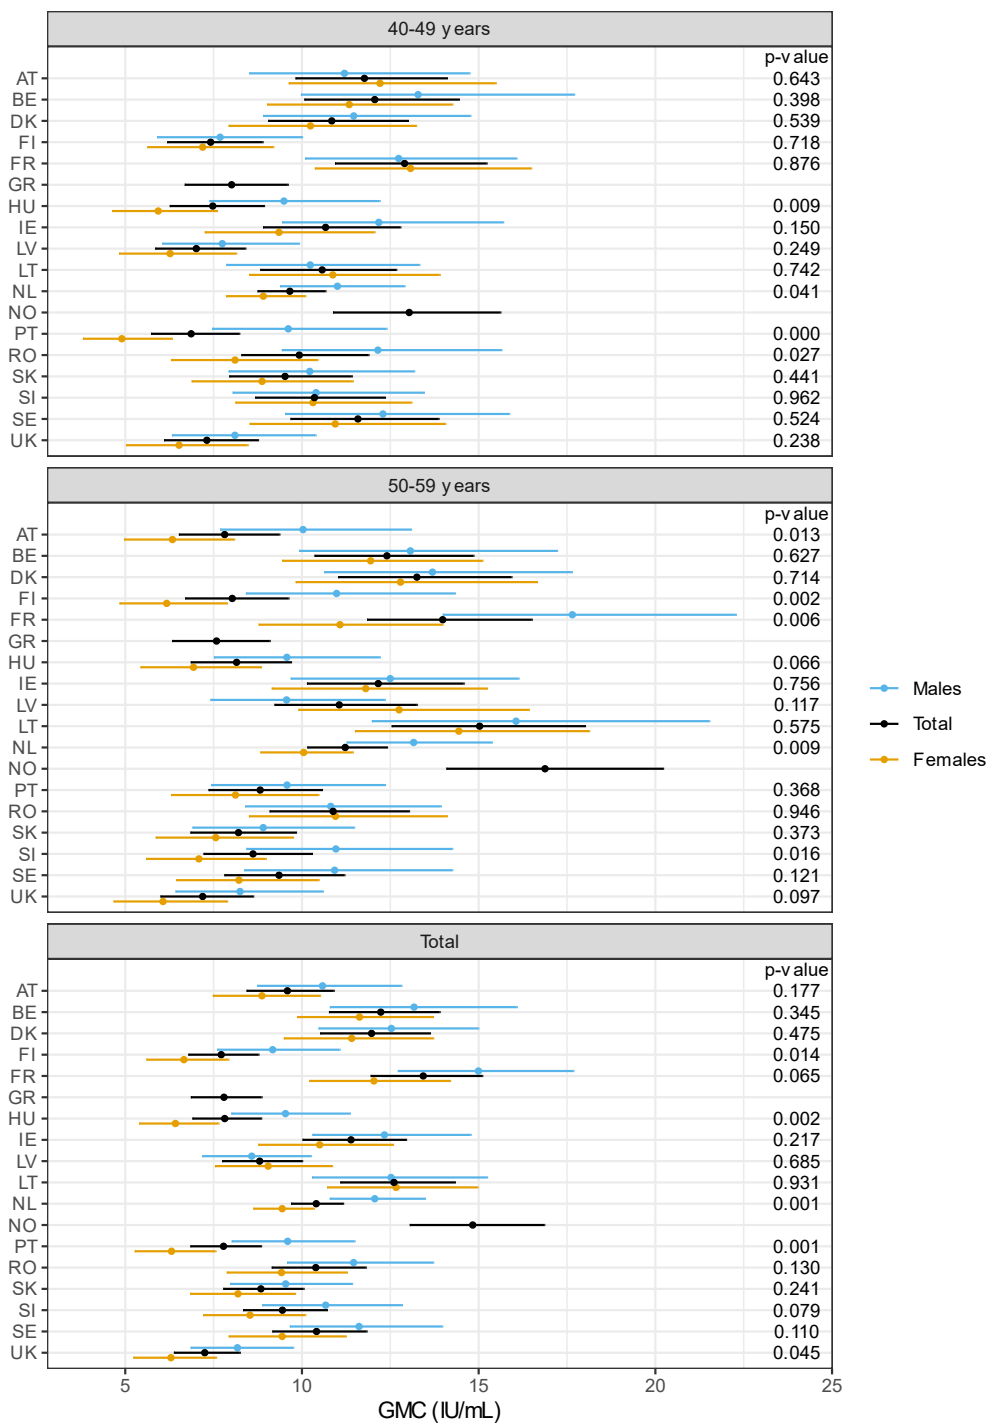

**Supplementary Fig.1** GMCs for IgG-PT in IU/mL in the two age groups (40-49 and 50-59) separately and in the total cohort, and subdivided by sex per country (Y-axis). The dots indicate the estimated geometric mean, the bars the corresponding 95% confidence intervals. The estimates and *p* values of the differences are obtained by a linear regression model. Abbreviations of all participating countries and the number of samples included in the study are listed in Table 1.

**Supplementary Table 1 *p* values for the differences in seroprevalences between the age groups, sex and countries**

| <b>Antibody level</b>     | <b>Age</b> | <b>Sex</b> | <b>Country</b> |
|---------------------------|------------|------------|----------------|
| IgG-PT $\geq 100$ IU/ml   | $p=0.846$  | $p=0.802$  | $p=0.023$      |
| IgG-PT 50 to $<100$ IU/ml | $p=0.212$  | $p=0.082$  | $p=0.007$      |
| IgG-PT $\geq 50$ IU/ml    | $p=0.038$  | $p=0.020$  | $p<0.001$      |
| IgG-Dt $<0.01$ IU/ml      | $p<0.001$  | $p<0.001$  | $p<0.001$      |
| IgG-Dt $<0.1$ IU/ml       | $p<0.001$  | $p<0.001$  | $p<0.001$      |
| IgG-TT $<0.01$ IU/ml      | $p=0.902$  | $p=0.986$  | $p=0.491$      |
| IgG-TT $<0.1$ IU/ml       | $p=0.001$  | $p<0.001$  | $p<0.001$      |

*p* values were analysed using the likelihood ratio test on a binomial generalised linear regression model.

**Supplementary Table 2 Notification rates (N/100,000) for subjects ≥15y from the ECDC Surveillance Atlas for pertussis during 2015-2018 by country.**

| Country              | Notification Rate (N/100,000), all cases, age 15 and above |       |       |       | Collection time |
|----------------------|------------------------------------------------------------|-------|-------|-------|-----------------|
|                      | 2015                                                       | 2016  | 2017  | 2018  |                 |
| Austria (AT)         | 5.52                                                       | 10.20 | 11.23 | 16.00 | 2015-2016       |
| Belgium (BE)         | –                                                          | –     | –     | –     | 2017            |
| Denmark (DK)         | 10.56                                                      | 23.34 | 12.62 | 12.16 | 2015-2016       |
| Finland (FI)         | 1.64                                                       | 4.94  | 4.32  | 5.82  | 2015-2016       |
| France (FR)          | –                                                          | –     | –     | –     | 2015-2016       |
| Greece (GR)          | 0.01                                                       | 0.01  | 0.00  | 0.02  | 2015            |
| Hungary (HU)         | 0.04                                                       | 0.02  | 0.16  | 0.19  | 2017            |
| Ireland (IE)         | 0.92                                                       | 1.91  | 2.86  | 1.12  | 2016-2017       |
| Latvia (LV)          | 5.69                                                       | 10.07 | 3.40  | 5.34  | 2015-2016       |
| Lithuania (LT)       | 0.56                                                       | 0.53  | 0.37  | 0.42  | 2016            |
| Netherlands (NL)     | 27.97                                                      | 22.89 | 21.00 | 19.58 | 2016-2017       |
| Norway (NO)          | 32.88                                                      | 34.81 | 35.60 | 33.70 | 2015-2016       |
| Portugal (PT)        | 0.28                                                       | 0.75  | 0.28  | 0.08  | 2015-2016       |
| Romania (RO)         | 0.09                                                       | 0.05  | 0.10  | 0.06  | 2018            |
| Slovak Republic (SK) | 6.77                                                       | 5.57  | 3.61  | 7.12  | 2016-2018       |
| Slovenia (SI)        | 1.42                                                       | 3.64  | 6.26  | 5.81  | 2015-2016       |
| Sweden (SE)          | 4.89                                                       | 5.31  | 6.27  | 5.55  | 2016            |
| United Kingdom (UK)  | 8.01                                                       | 10.99 | 6.80  | 5.18  | 2015-2016       |

Available at: <https://ecdc.europa.eu/en/pertussis/surveillance-and-disease-data/atlas>
